# Supplementary material for: Reasons for encounter by different levels of urgency in out-of-hours emergency primary health care in Norway: a cross sectional study
Source: PubMed Central journal article supplement (PMC5483255; doi:10.1186/s12873-017-0129-2), 2017-06-24
Supplement: 12873_2017_129_MOESM1_ESM.pdf [file 12873_2017_129_MOESM1_ESM.pdf]

**Additional table 1:** Reasons for encounter, ICPC-2 chapters. All urgency levels. Counts, proportions. Total, minimum and maximum incidence in individual OOH casualty clinics.

| ICPC-2 Chapter (RFE)                              | N       | Proportion of all RFEs |                | Incidence (per 100 000 person-years) |        |        |
|---------------------------------------------------|---------|------------------------|----------------|--------------------------------------|--------|--------|
|                                                   |         | %                      | (95% CI)       | All OOH clinics                      | Min    | Max    |
| <b>A – General and unspecified</b>                | 28 741  | 16.2                   | (16.1 to 16.4) | 5 523                                | 4 489  | 12 216 |
| <b>L – Musculoskeletal</b>                        | 28 710  | 16.2                   | (16.0 to 16.4) | 5 517                                | 4 610  | 7 654  |
| <b>R – Respiratory</b>                            | 21 775  | 12.3                   | (12.1 to 12.5) | 4 184                                | 3 188  | 7 813  |
| <b>D – Digestive</b>                              | 17 732  | 10.0                   | (9.9 to 10.2)  | 3 407                                | 2 839  | 5 365  |
| <b>S – Skin</b>                                   | 17 365  | 9.8                    | (9.7 to 9.9)   | 3 336                                | 2 834  | 7 147  |
| <b>U – Urology</b>                                | 9 470   | 5.3                    | (5.2 to 5.5)   | 1 819                                | 1 326  | 3 716  |
| <b>N – Neurological</b>                           | 7 468   | 4.2                    | (4.1 to 4.3)   | 1 435                                | 1 266  | 2 244  |
| <b>P – Psychological</b>                          | 7 232   | 4.1                    | (4.0 to 4.2)   | 1 389                                | 1 171  | 2 031  |
| <b>F – Eye</b>                                    | 6 886   | 3.9                    | (3.8 to 4.0)   | 1 323                                | 1 004  | 2 307  |
| <b>K – Circulatory</b>                            | 4 461   | 2.5                    | (2.4 to 2.6)   | 857                                  | 695    | 1 555  |
| <b>H – Ear</b>                                    | 4 294   | 2.4                    | (2.4 to 2.5)   | 825                                  | 664    | 1 635  |
| <b>W – Pregnancy, childbirth, family planning</b> | 1 719   | 1.0                    | (0.9 to 1.0)   | 330                                  | 162    | 711    |
| <b>X – Female genital system and breast</b>       | 1 360   | 0.8                    | (0.7 to 0.8)   | 261                                  | 145    | 518    |
| <b>Y – Male genital system</b>                    | 971     | 0.5                    | (0.5 to 0.6)   | 187                                  | 113    | 254    |
| <b>Z – Social problems</b>                        | 833     | 0.5                    | (0.4 to 0.5)   | 160                                  | 51     | 271    |
| <b>T – Endocrine, metabolic and nutritional</b>   | 787     | 0.5                    | (0.4 to 0.5)   | 169                                  | 114    | 396    |
| <b>B – Blood, lymphatics, spleen</b>              | 420     | 0.2                    | (0.2 to 0.3)   | 81                                   | 54     | 163    |
| <b>Unknown</b>                                    | 16 738  | 9.5                    | (9.3 to 9.6)   | 3 216                                | 856    | 9199   |
| <b>All encounters</b>                             | 177 053 | 100.0                  |                | 34 023                               | 28 945 | 52 732 |
