# Supplementary material for: Reasons for encounter by different levels of urgency in out-of-hours emergency primary health care in Norway: a cross sectional study
Source: PubMed Central journal article supplement (PMC5483255; doi:10.1186/s12873-017-0129-2), 2017-06-24
Supplement: 12873_2017_129_MOESM2_ESM.pdf [file 12873_2017_129_MOESM2_ESM.pdf]

**Additional table 2:** Reasons for encounter, ICPC-2 chapters. Green urgency level (not urgent). Counts, proportions. Total, minimum and maximum incidence in individual OOH casualty clinics.

| ICPC-2 Chapter (RFE)                            | Proportion of green RFEs |       |                | Incidence<br>(per 100 000 person-years) |        |        |
|-------------------------------------------------|--------------------------|-------|----------------|-----------------------------------------|--------|--------|
|                                                 | N                        | %     | (95% CI)       | All OOH clinics                         | Min    | Max    |
| <b>L – Musculoskeletal</b>                      | 20 619                   | 16.4  | (16.2 to 16.6) | 3 962                                   | 3 445  | 5 751  |
| <b>A – General and unspecified</b>              | 20 372                   | 16.2  | (16.0 to 16.4) | 3 915                                   | 3 127  | 8 865  |
| <b>R – Respiratory</b>                          | 15 814                   | 12.6  | (12.4 to 12.7) | 3 039                                   | 2 366  | 6 274  |
| <b>S – Skin</b>                                 | 12 822                   | 10.2  | (10 to 10.3)   | 2 464                                   | 2 014  | 5 006  |
| <b>D – Digestive</b>                            | 11 878                   | 9.4   | (9.3 to 9.6)   | 2 283                                   | 1 901  | 3 615  |
| <b>U – Urology</b>                              | 7 317                    | 5.8   | (5.7 to 5.9)   | 1 406                                   | 1 057  | 3 262  |
| <b>F – Eye</b>                                  | 5 518                    | 4.4   | (4.3 to 4.5)   | 1 060                                   | 774    | 2 045  |
| <b>P – Psychological</b>                        | 4 681                    | 3.7   | (3.6 to 3.8)   | 900                                     | 728    | 1 391  |
| <b>N – Neurological</b>                         | 4 102                    | 3.3   | (3.2 to 3.4)   | 788                                     | 657    | 1 240  |
| <b>H – Ear</b>                                  | 4 001                    | 3.2   | (3.1 to 3.3)   | 769                                     | 619    | 1 594  |
| <b>K – Circulatory</b>                          | 1 668                    | 1.3   | (1.3 to 1.4)   | 321                                     | 227    | 803    |
| <b>W – Pregnancy, childbirth, family</b>        | 1 272                    | 1.0   | (1.0 to 1.1)   | 244                                     | 132    | 437    |
| <b>X – Female genital system and breast</b>     | 1 057                    | 0.8   | (0.8 to 0.9)   | 203                                     | 117    | 426    |
| <b>Y – Male genital system</b>                  | 686                      | 0.5   | (0.5 to 0.6)   | 132                                     | 75     | 198    |
| <b>T – Endocrine, metabolic and nutritional</b> | 579                      | 0.5   | (0.4 to 0.5)   | 111                                     | 68     | 335    |
| <b>Z – Social problems</b>                      | 538                      | 0.4   | (0.4 to 0.5)   | 103                                     | 29     | 200    |
| <b>B – Blood, lymphatics, spleen</b>            | 297                      | 0.2   | (0.2 to 0.3)   | 57                                      | 31     | 134    |
| <b>Unknown</b>                                  | 12 749                   | 10.1  | (10 to 10.3)   | 2 450                                   | 551    | 7 242  |
| <b>All green encounters</b>                     | 125 97                   | 100.0 |                | 24 207                                  | 20 408 | 37 023 |
