# Supplementary material for: Reasons for encounter by different levels of urgency in out-of-hours emergency primary health care in Norway: a cross sectional study
Source: PubMed Central journal article supplement (PMC5483255; doi:10.1186/s12873-017-0129-2), 2017-06-24
Supplement: 12873_2017_129_MOESM3_ESM.pdf [file 12873_2017_129_MOESM3_ESM.pdf]

**Additional table 3:** Reasons for encounter, ICPC-2 chapters. Yellow urgency level (urgent). Counts, proportions. Total, minimum and maximum incidence in individual OOH casualty clinics.

| ICPC-2 Chapter (RFE)                            | Proportion of yellow RFEs |       |                | Incidence<br>(per 100 000 inhabitants per year) |       |        |
|-------------------------------------------------|---------------------------|-------|----------------|-------------------------------------------------|-------|--------|
|                                                 | N                         | %     | (95% CI)       | All OOH clinics                                 | Min   | Max    |
| <b>L – Musculoskeletal</b>                      | 7 894                     | 17.5  | (17.1 to 17.8) | 1 517                                           | 1 139 | 2 540  |
| <b>A – General and unspecified</b>              | 6 401                     | 14.2  | (13.9 to 14.5) | 1 230                                           | 1 079 | 2 468  |
| <b>D – Digestive</b>                            | 5 529                     | 12.3  | (12.0 to 12.6) | 1 062                                           | 880   | 1 980  |
| <b>R – Respiratory</b>                          | 5 372                     | 11.9  | (11.6 to 12.2) | 1 032                                           | 730   | 1 835  |
| <b>S – Skin</b>                                 | 4 438                     | 9.8   | (9.6 to 10.1)  | 853                                             | 636   | 2 144  |
| <b>N – Neurological</b>                         | 2 816                     | 6.2   | (6.0 to 6.5)   | 541                                             | 481   | 772    |
| <b>P – Psychological</b>                        | 2 255                     | 5.0   | (4.8 to 5.2)   | 433                                             | 398   | 609    |
| <b>U – Urology</b>                              | 2 139                     | 4.7   | (4.5 to 4.9)   | 411                                             | 267   | 679    |
| <b>K – Circulatory</b>                          | 1 771                     | 3.9   | (3.7 to 4.1)   | 340                                             | 256   | 546    |
| <b>F – Eye</b>                                  | 1 340                     | 3.0   | (2.8 to 3.1)   | 257                                             | 209   | 345    |
| <b>W – Pregnancy, childbirth, family</b>        | 401                       | 0.9   | (0.8 to 1.0)   | 77                                              | 23    | 234    |
| <b>H – Ear</b>                                  | 288                       | 0.6   | (0.6 to 0.7)   | 55                                              | 35    | 104    |
| <b>X – Female genital system and breast</b>     | 286                       | 0.6   | (0.6 to 0.7)   | 55                                              | 27    | 75     |
| <b>Z – Social problems</b>                      | 274                       | 0.6   | (0.5 to 0.7)   | 53                                              | 0     | 64     |
| <b>Y – Male genital system</b>                  | 271                       | 0.6   | (0.5 to 0.7)   | 52                                              | 23    | 61     |
| <b>T – Endocrine, metabolic and nutritional</b> | 249                       | 0.6   | (0.5 to 0.6)   | 48                                              | 36    | 84     |
| <b>B – Blood, lymphatics, spleen</b>            | 112                       | 0.2   | (0.2 to 0.3)   | 22                                              | 16    | 35     |
| <b>Unknown</b>                                  | 3 296                     | 7.3   | (7.1 to 7.5)   | 633                                             | 150   | 1 521  |
| <b>All yellow encounters</b>                    | 45 132                    | 100.0 |                | 8 673                                           | 7602  | 13 781 |
