# Supplementary material for: Reasons for encounter by different levels of urgency in out-of-hours emergency primary health care in Norway: a cross sectional study
Source: PubMed Central journal article supplement (PMC5483255; doi:10.1186/s12873-017-0129-2), 2017-06-24
Supplement: 12873_2017_129_MOESM4_ESM.pdf [file 12873_2017_129_MOESM4_ESM.pdf]

**Additional table 4:** Reasons for encounter, ICPC-2 chapters. Red urgency level (life threatening). Counts, proportions. Total, minimum and maximum incidence in individual OOH casualty clinics.

| ICPC-2 Chapter (RFE)                            | Proportion of red RFEs |       |                | Incidence<br>(per 100 000 person-years) |     |       |
|-------------------------------------------------|------------------------|-------|----------------|-----------------------------------------|-----|-------|
|                                                 | N                      | %     | (95% CI)       | All OOH clinics                         | Min | Max   |
| <b>A – General and unspecified</b>              | 1 923                  | 34.4  | (33.1 to 35.6) | 369.5                                   | 136 | 640   |
| <b>K – Circulatory</b>                          | 1 018                  | 18.2  | (17.2 to 19.2) | 195.6                                   | 138 | 518   |
| <b>R – Respiratory</b>                          | 578                    | 10.3  | (9.5 to 11.1)  | 111.1                                   | 57  | 203   |
| <b>N – Neurological</b>                         | 547                    | 9.8   | (9.0 to 10.6)  | 105.1                                   | 52  | 305   |
| <b>D – Digestive</b>                            | 303                    | 5.4   | (4.8 to 6.0)   | 58.2                                    | 22  | 122   |
| <b>P – Psychological</b>                        | 287                    | 5.1   | (4.6 to 5.7)   | 55.2                                    | 30  | 70    |
| <b>L – Musculoskeletal</b>                      | 190                    | 3.4   | (2.9 to 3.9)   | 36.5                                    | 17  | 73    |
| <b>S – Skin</b>                                 | 93                     | 1.7   | (1.3 to 2.0)   | 17.9                                    | 5   | 30    |
| <b>T – Endocrine, metabolic and nutritional</b> | 50                     | 0.9   | (0.6 to 1.1)   | 9.6                                     | 0   | 18    |
| <b>W – Pregnancy, childbirth, family</b>        | 44                     | 0.8   | (0.6 to 1.0)   | 8.5                                     | 2   | 41    |
| <b>F – Eye</b>                                  | 27                     | 0.5   | (0.3 to 0.7)   | 5.2                                     | 2   | 30    |
| <b>X – Female genital system and breast</b>     | 16                     | 0.3   | (0.1 to 0.4)   | 3.1                                     | 0   | 10    |
| <b>Z – Social problems</b>                      | 16                     | 0.3   | (0.1 to 0.4)   | 3.1                                     | 0   | 12    |
| <b>Y – Male genital system</b>                  | 14                     | 0.3   | (0.1 to 0.4)   | 2.7                                     | 0   | 5     |
| <b>B – Blood, lymphatics, spleen</b>            | 11                     | 0.2   | (0.1 to 0.3)   | 2.1                                     | 0   | 10    |
| <b>U – Urology</b>                              | 11                     | 0.2   | (0.1 to 0.3)   | 2.1                                     | 0   | 6     |
| <b>H – Ear</b>                                  | 3                      | 0,1   | (0.0 to 0,1)   | 0,6                                     | 0   | 2     |
| <b>Unknown</b>                                  | 461                    | 8,2   | (7,5 to 9.0)   | 88,6                                    | 15  | 204   |
| <b>All red encounters</b>                       | 5 592                  | 100,0 |                | 1 075                                   | 570 | 2 163 |
